# Supplementary material for: Evolution and Epidemic Spread of the Avian Infectious Bronchitis Virus (IBV) GI-23 in Brazil
Source: MDPI journal article supplement (doi:10.3390/v15061229), 2023-05-24
Supplement: s1 [file s1]

**Table S1.** Metadata of 94 IBV GI-23 isolates sequenced in this study.

| <b>GenBank</b> | <b>Isolate</b> | <b>Country</b> | <b>Year</b> |
|----------------|----------------|----------------|-------------|
| OQ884498       | SB001_oct21    | Brazil         | 2021        |
| OQ884499       | SB002_oct21    | Brazil         | 2021        |
| OQ884500       | SB003_oct21    | Brazil         | 2021        |
| OQ884501       | SB004_nov21    | Brazil         | 2021        |
| OQ884502       | SB005_nov21    | Brazil         | 2021        |
| OQ884503       | SB006_dec21    | Brazil         | 2021        |
| OQ884504       | SB007_dec21    | Brazil         | 2021        |
| OQ884505       | SB008_jan22    | Brazil         | 2022        |
| OQ884506       | SB009_jan22    | Brazil         | 2022        |
| OQ884507       | SB010_jan22    | Brazil         | 2022        |
| OQ884508       | SB011_jan22    | Brazil         | 2022        |
| OQ884509       | SB012_jan22    | Brazil         | 2022        |
| OQ884510       | SB013_jan22    | Brazil         | 2022        |
| OQ884511       | SB014_jan22    | Brazil         | 2022        |
| OQ884512       | SB015_jan22    | Brazil         | 2022        |
| OQ884513       | SB016_jan22    | Brazil         | 2022        |
| OQ884514       | SB017_jan22    | Brazil         | 2022        |
| OQ884515       | SB018_jan22    | Brazil         | 2022        |
| OQ884516       | SB019_jan22    | Brazil         | 2022        |
| OQ884517       | SB020_jan22    | Brazil         | 2022        |
| OQ884518       | SB021_jan22    | Brazil         | 2022        |
| OQ884519       | SB022_jan22    | Brazil         | 2022        |
| OQ884520       | SB023_jan22    | Brazil         | 2022        |
| OQ884521       | SB024_jan22    | Brazil         | 2022        |
| OQ884522       | SB025_jan22    | Brazil         | 2022        |
| OQ884523       | SB026_jan22    | Brazil         | 2022        |
| OQ884524       | SB027_jan22    | Brazil         | 2022        |
| OQ884525       | SB028_jan22    | Brazil         | 2022        |
| OQ884526       | SB029_jan22    | Brazil         | 2022        |
| OQ884527       | SB030_jan22    | Brazil         | 2022        |
| OQ884528       | SB031_jan22    | Brazil         | 2022        |
| OQ884529       | SB032_jan22    | Brazil         | 2022        |
| OQ884530       | SB033_jan22    | Brazil         | 2022        |
| OQ884531       | SB034_jan22    | Brazil         | 2022        |
| OQ884532       | SB035_jan22    | Brazil         | 2022        |
| OQ884533       | SB036_jan22    | Brazil         | 2022        |
| OQ884534       | SB037_jan22    | Brazil         | 2022        |
| OQ884535       | SB038_jan22    | Brazil         | 2022        |
| OQ884536       | SB039_feb22    | Brazil         | 2022        |
| OQ884537       | SB040_feb22    | Brazil         | 2022        |
| OQ884538       | SB041_feb22    | Brazil         | 2022        |

|          |             |        |      |
|----------|-------------|--------|------|
| OQ884539 | SB042_feb22 | Brazil | 2022 |
| OQ884540 | SB043_feb22 | Brazil | 2022 |
| OQ884541 | SB044_feb22 | Brazil | 2022 |
| OQ884542 | SB045_feb22 | Brazil | 2022 |
| OQ884543 | SB046_feb22 | Brazil | 2022 |
| OQ884544 | SB047_apr22 | Brazil | 2022 |
| OQ884545 | SB048_sep22 | Brazil | 2022 |
| OQ884546 | SB049_sep22 | Brazil | 2022 |
| OQ884547 | SB050_sep22 | Brazil | 2022 |
| OQ884548 | SB051_oct22 | Brazil | 2022 |
| OQ884549 | SB052_oct22 | Brazil | 2022 |
| OQ884550 | SB053_oct22 | Brazil | 2022 |
| OQ884551 | SB054_nov22 | Brazil | 2022 |
| OQ884552 | SB055_nov22 | Brazil | 2022 |
| OQ884553 | SB056_nov22 | Brazil | 2022 |
| OQ884554 | SB057_nov22 | Brazil | 2022 |
| OQ884555 | SB058_nov22 | Brazil | 2022 |
| OQ884556 | SB059_nov22 | Brazil | 2022 |
| OQ884557 | SB060_nov22 | Brazil | 2022 |
| OQ884558 | SB061_nov22 | Brazil | 2022 |
| OQ884559 | SB062_dec22 | Brazil | 2022 |
| OQ884560 | SB063_dec22 | Brazil | 2022 |
| OQ884561 | SB064_dec22 | Brazil | 2022 |
| OQ884562 | SB065_dec22 | Brazil | 2022 |
| OQ884563 | SB066_dec22 | Brazil | 2022 |
| OQ884564 | SB067_dec22 | Brazil | 2022 |
| OQ884565 | SB068_dec22 | Brazil | 2022 |
| OQ884566 | SB069_dec22 | Brazil | 2022 |
| OQ884567 | SB070_dec22 | Brazil | 2022 |
| OQ884568 | SB071_dec22 | Brazil | 2022 |
| OQ884569 | SB072_dec22 | Brazil | 2022 |
| OQ884570 | SB073_dec22 | Brazil | 2022 |
| OQ884571 | SB074_dec22 | Brazil | 2022 |
| OQ884572 | SB075_dec22 | Brazil | 2022 |
| OQ884573 | SB076_dec22 | Brazil | 2022 |
| OQ884574 | SB077_jan23 | Brazil | 2023 |
| OQ884575 | SB078_jan23 | Brazil | 2023 |
| OQ884576 | SB079_jan23 | Brazil | 2023 |
| OQ884577 | SB080_jan23 | Brazil | 2023 |
| OQ884578 | SB081_jan23 | Brazil | 2023 |
| OQ884579 | SB082_jan23 | Brazil | 2023 |
| OQ884580 | SB083_jan23 | Brazil | 2023 |
| OQ884581 | SB084_jan23 | Brazil | 2023 |

|          |             |        |      |
|----------|-------------|--------|------|
| OQ884582 | SB085_jan23 | Brazil | 2023 |
| OQ884583 | SB086_jan23 | Brazil | 2023 |
| OQ884584 | SB087_jan23 | Brazil | 2023 |
| OQ884585 | SB088_jan23 | Brazil | 2023 |
| OQ884586 | SB089_jan23 | Brazil | 2023 |
| OQ884587 | SB090_jan23 | Brazil | 2023 |
| OQ884588 | SB091_jan23 | Brazil | 2023 |
| OQ884589 | SB092_jan23 | Brazil | 2023 |
| OQ884590 | SB093_jan23 | Brazil | 2023 |
| OQ884591 | SB094_jan23 | Brazil | 2023 |

---
