# Supplementary figures and images for: Evolution and Epidemic Spread of the Avian Infectious Bronchitis Virus (IBV) GI-23 in Brazil
Source: MDPI journal article supplement (doi:10.3390/v15061229), 2023-05-24

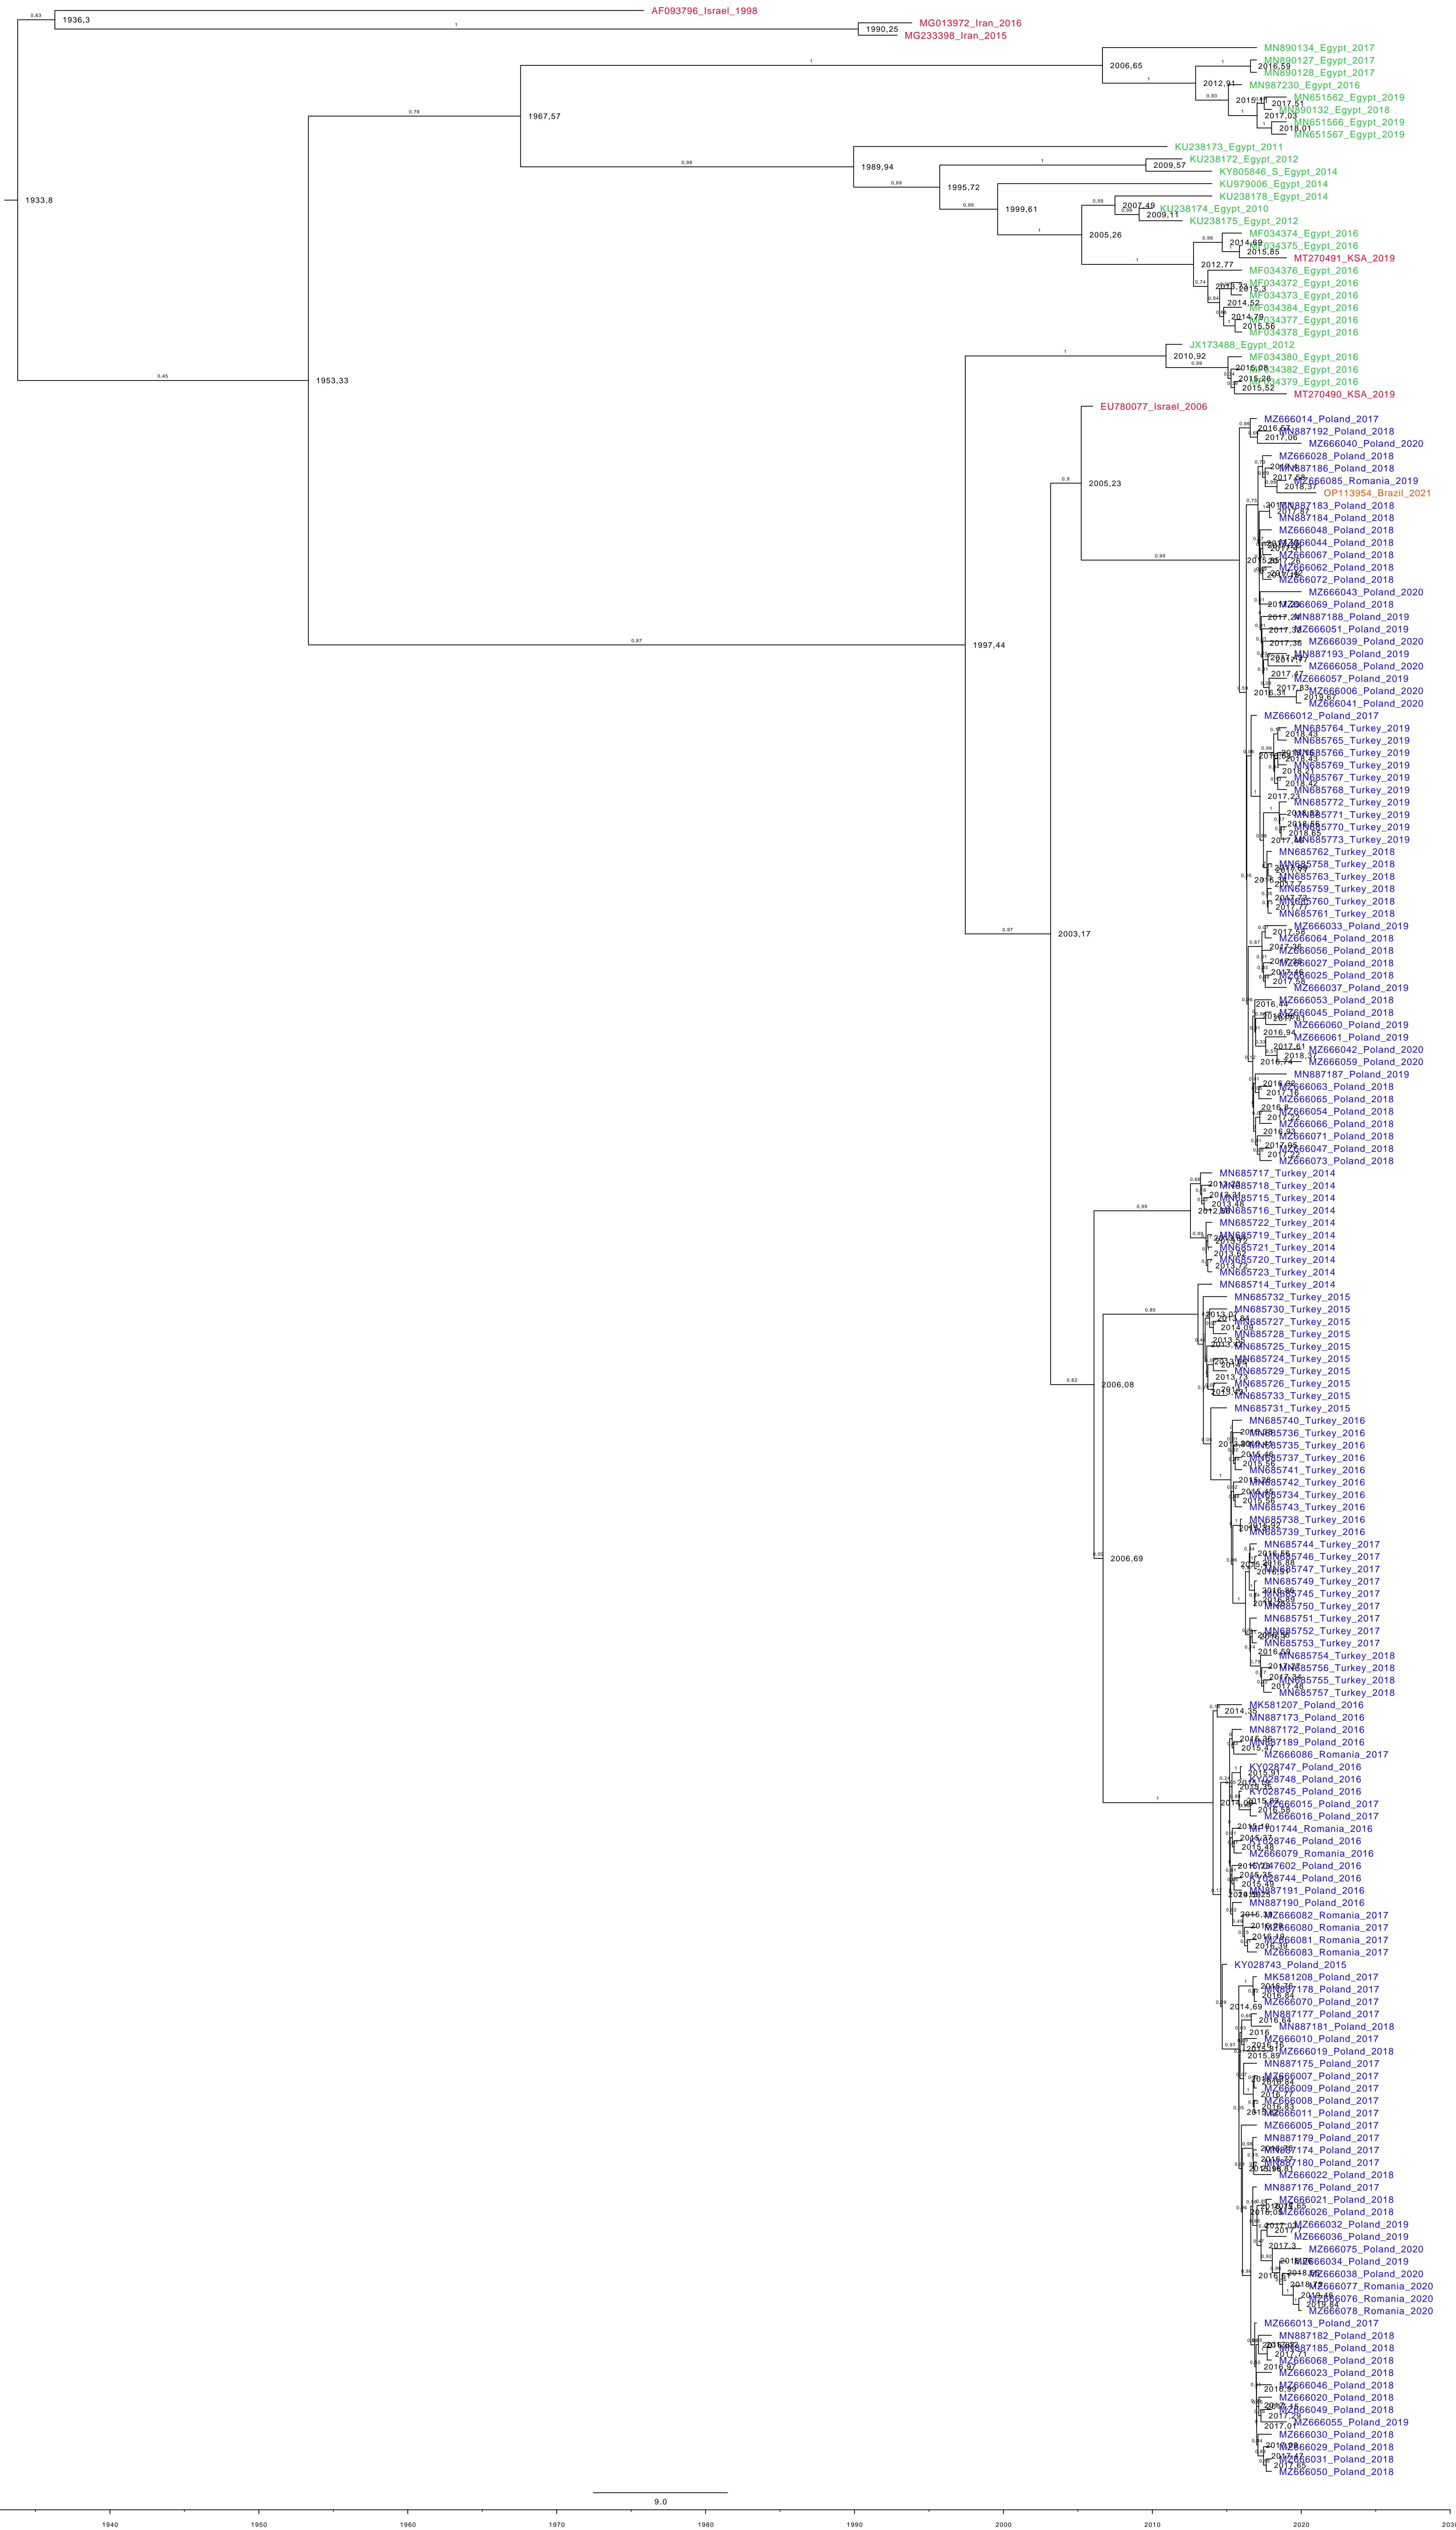

Supplement: s1 [file s1]
